# Supplementary material for: Changes in Watering Frequency Stimulate Differentiated Adaptive Responses among Seedlings of Different Beech Populations
Source: MDPI journal article supplement (doi:10.3390/biology11020306), 2022-02-14
Supplement: s1 [file s1]

**Table S3.** Descriptive statistics (mean value  $\pm$  standard error) of beech provenances under the applied watering treatments

| Trait                                         | Evros                    |                          | Drama                  |                       |
|-----------------------------------------------|--------------------------|--------------------------|------------------------|-----------------------|
|                                               | FR                       | NF                       | FR                     | NF                    |
|                                               | Mean value               | Mean value               | Mean value             | Mean value            |
| Specific leaf area-SLA (mm <sup>2</sup> /μg ) | 325.582 $\pm$ 12.34<br>4 | 348.505 $\pm$ 11.96<br>2 | 315.632 $\pm$ 8.005    | 332.130 $\pm$ 7.867   |
| Leaf dry matter content-LDMC                  | 1.347 $\pm$ 0.019        | 1.253 $\pm$ 0.028        | 1.281 $\pm$ 0.025      | 1.202 $\pm$ 0.024     |
| Leaf thickness (μm)                           | 0.270 $\pm$ 0.013        | 0.249 $\pm$ 0.010        | 0.262 $\pm$ 0.009      | 0.264 $\pm$ 0.008     |
| Leaf length (mm)                              | 33.255 $\pm$ 1.034       | 30.956 $\pm$ 0.933       | 36.478 $\pm$ 1.414     | 35.860 $\pm$ 1.012    |
| Leaf width (mm)                               | 21.076 $\pm$ 0.656       | 20.781 $\pm$ 0.597       | 23.783 $\pm$ 0.807     | 22.545 $\pm$ 0.589    |
| Leaf base angle (°)                           | 106.556 $\pm$ 1.670      | 110.264 $\pm$ 1.838      | 108.168 $\pm$ 1.383    | 105.967 $\pm$ 1.851   |
| Leaf tip angle (°)                            | 91.381 $\pm$ 1.007       | 92.839 $\pm$ 1.457       | 89.947 $\pm$ 1.333     | 89.223 $\pm$ 0.863    |
| Number of leaf secondary veins                | 15.056 $\pm$ 0.365       | 14.537 $\pm$ 0.344       | 15.679 $\pm$ 0.272     | 14.214 $\pm$ 0.348    |
| Leaf circularity                              | 0.737 $\pm$ 0.007        | 0.719 $\pm$ 0.006        | 0.746 $\pm$ 0.005      | 0.677 $\pm$ 0.006     |
| Shoot length (cm)                             | 14.009 $\pm$ 0.407       | 14.912 $\pm$ 0.378       | 15.665 $\pm$ 0.424     | 16.044 $\pm$ 0.478    |
| Shoot dry weight (mg)                         | 0.273 $\pm$ 0.014        | 0.334 $\pm$ 0.014        | 0.344 $\pm$ 0.022      | 0.318 $\pm$ 0.011     |
| Root area (mm <sup>2</sup> )                  | 1187.871 $\pm$ 103.726   | 1440.010 $\pm$ 197.157   | 1134.648 $\pm$ 116.171 | 1023.683 $\pm$ 83.732 |
| Root dry weight (mg)                          | 0.317 $\pm$ 0.025        | 0.389 $\pm$ 0.022        | 0.380 $\pm$ 0.028      | 0.361 $\pm$ 0.020     |
| Section area (μm <sup>2</sup> )               | 2338.964 $\pm$ 94.700    | 2991.380 $\pm$ 105.960   | 2528.972 $\pm$ 147.617 | 1729.094 $\pm$ 55.288 |
| Phellem length (μm)                           | 19.152 $\pm$ 0.723       | 20.537 $\pm$ 0.497       | 21.477 $\pm$ 0.479     | 20.544 $\pm$ 0.594    |
| Cortex length (μm)                            | 39.298 $\pm$ 1.567       | 46.935 $\pm$ 1.231       | 44.848 $\pm$ 2.208     | 40.035 $\pm$ 1.557    |
| Phloem length (μm)                            | 66.815 $\pm$ 2.279       | 87.183 $\pm$ 2.772       | 76.625 $\pm$ 1.859     | 67.349 $\pm$ 1.126    |
| Xylem length (μm)                             | 374.464 $\pm$ 11.996     | 501.306 $\pm$ 18.693     | 461.783 $\pm$ 14.296   | 397.644 $\pm$ 14.144  |
| Pith length (μm)                              | 470.555 $\pm$ 15.176     | 552.099 $\pm$ 14.212     | 479.867 $\pm$ 13.107   | 439.907 $\pm$ 11.140  |
| Stomatal density                              | 127.247 $\pm$ 3.041      | 117.854 $\pm$ 3.302      | 129.857 $\pm$ 5.208    | 145.298 $\pm$ 4.752   |
| Number of pith rays                           | 19.333 $\pm$ 0.482       | 19.130 $\pm$ 0.409       | 17.179 $\pm$ 0.279     | 17.821 $\pm$ 0.557    |
